# Supplementary material for: The effect of effective rock viscosity on 2-D magmatic porosity waves
Source: Copernicus journal article supplement (doi:10.5194/se-10-2103-2019), 2019-12-03
Supplement: Supplementary file 1 [file se-10-2103-2019-supplement.pdf]

Supplement of Solid Earth, 10, 2103–2113, 2019  
<https://doi.org/10.5194/se-10-2103-2019-supplement>  
© Author(s) 2019. This work is distributed under  
the Creative Commons Attribution 4.0 License.

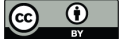

*Supplement of*

## **The effect of effective rock viscosity on 2-D magmatic porosity waves**

**Janik Dohmen et al.**

*Correspondence to:* Janik Dohmen (dohmen@geophysik.uni-frankfurt.de)

The copyright of individual parts of the supplement might differ from the CC BY 4.0 License.

## Supplementary Material

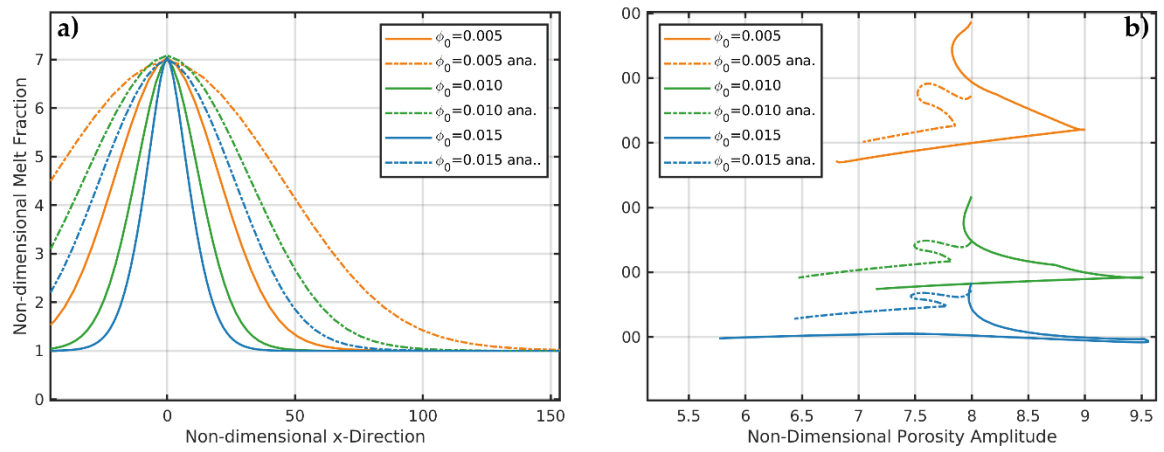

**Fig. 1:** Like Fig. 8 but with the scaling used by Richard et al. (2012).
